# Supplementary material for: Label-free and ultrasensitive SERS detection of pesticide residues using 3D hot-junction of a Raman enhancing montmorillonite/silver nanoparticles nanocomposite
Source: Royal Society of Chemistry journal article supplement (doi:10.1039/d2ay00090c), 2022-01-01
Supplement: d2ay00090c1.pdf [file d2ay00090c1.pdf]

**Label-Free and ultrasensitive SERS detection of pesticide residue using 3D hot-junction of Raman enhancing montmorillonite/silver nanoparticles nanocomposite**

**Xiaojuan Zhao<sup>a</sup>, Dan Sun<sup>b</sup>, Man Yu<sup>a</sup>, Yan Xu<sup>c</sup>, Hui Xie<sup>a, \*</sup>**

<sup>a</sup> School of Materials Engineering, Xi'an Aeronautical University, Xi'an 710077, China

<sup>b</sup> School of Pharmacy, Nantong University, Nantong, Jiangsu 226001, China;

<sup>c</sup> State Key Laboratory of Inorganic Synthesis and Preparative Chemistry, College of Chemistry, Jilin University, Changchun 130012, P.R. China

\*Corresponding author

E-mail: xiehui@xaau.edu.cn.

Postal address: School of Materials Engineering, Xi'an Aeronautical University, Xi'an 710077, China

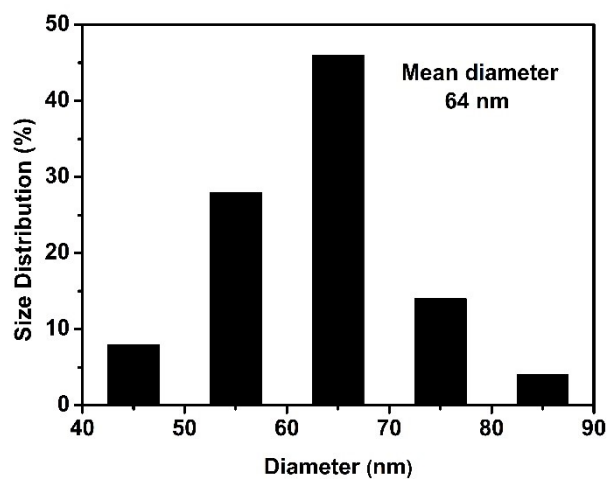

Fig. S1 Histogram of the AgNPs size distribution.

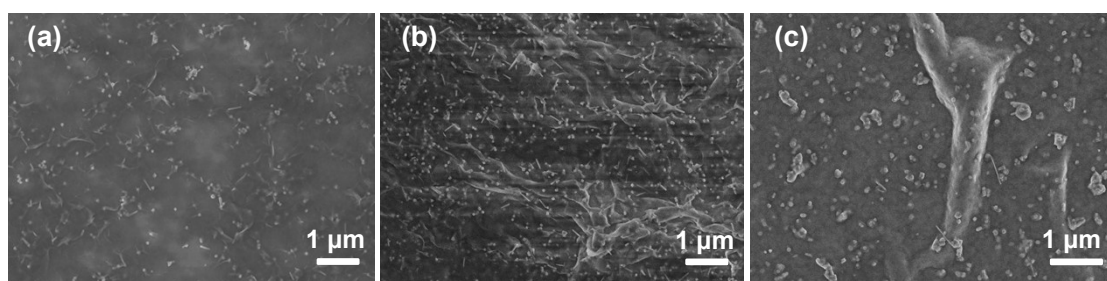

Fig. S2 SEM images of MMT/AgNPs nanocomposite with different volume ratio of MMT and AgNPs: (a) 1:7, (b) 1:10 and (c) 1:20.

Table S1 The SERS vibrational band assignments of thiram

| Peak position (cm <sup>-1</sup> ) | Assignment                                                                       |
|-----------------------------------|----------------------------------------------------------------------------------|
| 561                               | S-S stretching                                                                   |
| 931                               | C=S and CH <sub>3</sub> N stretching                                             |
| 1143                              | CN stretching, CH <sub>3</sub> rocking                                           |
| 1378                              | CN stretching, symmetric<br>CH <sub>3</sub> deformation                          |
| 1505                              | CN stretching vibration, CH <sub>3</sub><br>deformation, CH <sub>3</sub> rocking |

Table S2 Comparison of the proposed approach with reported methods for the detection of thiram.

| Method          | Limit of detection             | Detection range                                       | $R^2$     | Ref.      |
|-----------------|--------------------------------|-------------------------------------------------------|-----------|-----------|
| Fluorescence    | 0.1 $\mu\text{g/mL}$           | 0.5-2.5 $\mu\text{g/mL}$                              | 0.9993    | 1         |
| Fluorescence    | 70 nM                          | 0.5-1000 $\mu\text{M}$                                | 0.9926    | 2         |
| Phosphorescenc  | 25.0 nM                        | 0.05–2.5 $\mu\text{M}$                                | -         | 3         |
| Colorimetric    | 0.036 $\mu\text{M}$            | 0.1- 100 $\mu\text{M}$                                | 0.95/0.99 | 4         |
| Colorimetric    | 19.7 nM                        | 0.025-0.35 $\mu\text{M}$                              | 0.99345   | 5         |
| Electrochemical | $0.7 \times 10^{-6} \text{ M}$ | -                                                     | 0.99      | 6         |
| HPLC            | 0.22 $\mu\text{g/mL}$          | 0.07-15 $\mu\text{g/mL}$                              | 0.9905    | 7         |
| Raman           | $10^{-7} \text{ M}$            | $1.0 \times 10^{-7}$ - $1.0 \times 10^{-3} \text{ M}$ | 0.9978    | 8         |
| Raman           | 50 ng/g                        | 0.1–12 $\mu\text{g/g}$                                | 0.9950    | 9         |
| Raman           | $1.0 \times 10^{-8} \text{ M}$ | $1.0 \times 10^{-8}$ - $1.0 \times 10^{-3} \text{ M}$ | 0.9927    | This work |

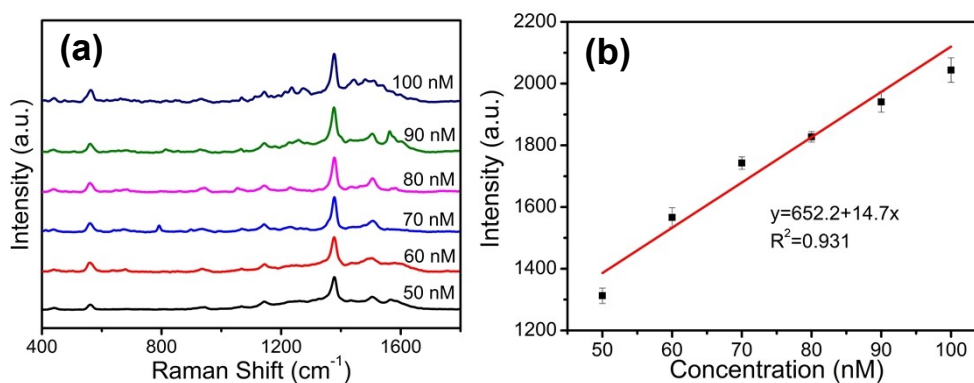

Fig. S3 (a) SERS detection of thiram on the apple. (b) The averaged peak intensities of the 1378  $\text{cm}^{-1}$  as a function of the concentration of thiram on the apple.

## References

1. Z. Tang, Z. Chen and G. Li, Y. Hong, *Anal Chim Acta*, 2020, **1136**, 72.
2. J.R. Bhamore, S. Jha, A.K. Mungara, R.K. Singhal, D. Sonkeshariya and S.K. Kailasa, *Biosens. Bioelectron.*, 2016, **0**, 243.
3. Z. Cheng, K. Zhang, T. Zhao, B. Liu, Z. Wang and Z. Zhang, *Sens. Actuators B Chem.*, 2017, **252**, 1083.
4. V.T. Hoang, N.X. Dinh, N.L.N. Trang, N.T. Khi, N.V. Quy, P.A. Tuan, D.Q. Tri, L.H. Thang T.Q. Huy and A.T. Le, *Mater. Res. Bull.*, 2021, **139**, 111278.
5. C. Zhang, X. Jiang, F. Yu, Y. Liu, Q. Yue, P. Yang and Y. Liu, *Sens. Actuators B Chem.*, 2021, **344**, 130304.
6. P.N. Ragam and B. Mathew, *Int J Environ Sci Te.*, 2020, **17**, 1739.
7. K. Charoenkitamorn, O. Chailapakul and W. Siangproh, *Talanta*, 2015, **132**, 416.
8. A. Jiao, X. Dong, H. Zhang, L. Xu, Y. Tian, X. Liu and M. Chen, *Spectrochim. Acta A.*, 2019, **209**, 241.
9. M. Chen, W. Luo, Q. Liu, N. Hao, Y. Zhu, M. Liu, L. Wang, H. Yang and X.Q. Chen, *Anal. Chem.*, 2018, **90**, 13647.
